# Supplementary material for: Ethical Reporting of Consent and Assent in Paediatric Oral Health Research in Malaysia: A Scoping Review
Source: Research Square preprint supplement (doi:10.21203/rs.3.rs-7565143/v1), 2025-09-22
Supplement: Supplementary file 1 [file e413c465ac693a0f103d7839.pdf]

## Appendix 2

### Data collection form

[illegible]
